# Supplementary material for: An endoplasmic reticulum stress-related signature could robustly predict prognosis and closely associate with response to immunotherapy in pancreatic ductal adenocarcinoma
Source: J Cancer Res Clin Oncol. 2023 Aug 31;149(17):15589–608. doi: 10.1007/s00432-023-05312-x (PMC10620278; doi:10.1007/s00432-023-05312-x)
Supplement: Supplementary file 9 — Table S2 GSEA (XLS 41 KB) [file 432_2023_5312_MOESM9_ESM.xls]

## Sheet: Table S2 GSEA
	ID	Description	setSize	enrichmentScore	NES	pvalue	p.adjust	qvalue	rank	leading_edge	core_enrichment
hsa05168	hsa05168	Herpes simplex virus 1 infection	465	-0.448	-2.026	0	0	0	3939	tags=42%, list=24%, signal=33%	ZNF675/ZNF230/ZNF471/ZNF528/ZNF233/ZFP1/NXF1/ZNF506/ ZFP14/APAF1/BST2/ZNF563/ZNF431/ZNF17/ZNF558/ZNF549/ ZNF813/ZNF101/ZNF84/ZNF853/ZNF583/PTPN11/ZNF285/ZNF701/ MAP3K7/CASP8/ZNF600/ZNF699/ZNF569/TRAF6/ZNF25/ZNF256/ ZNF879/ZNF714/ZNF621/ZNF426/ZNF599/ZNF398/IFNAR2/ZNF136/ PIK3CA/ZNF14/ZNF793/ZNF766/PILRB/ZNF620/ZNF792/TBK1/ ZNF721/ZNF223/AKT1/ZNF726/ZNF682/ZFP90/ZNF737/ZNF100/ ZNF45/STAT1/ZNF317/Z…
hsa04972	hsa04972	Pancreatic secretion	95	-0.656	-2.535	0	0	0	2006	tags=38%, list=12%, signal=33%	ADCY9/PLCB1/CHRM3/ATP1A1/RAB11A/CELA2B/CTRL/ITPR1/GNAQ/ SLC9A1/CELA2A/PRSS3/PLA2G12A/PNLIPRP1/PLCB4/RAB27B/ PNLIPRP2/ATP2A3/CPA2/CPA3/ATP1B1/CTRB2/SLC12A2/CEL/ FXYD2/CELA3A/CPA1/CA2/AMY2B/PLA2G1B/PNLIP/CFTR/ PRSS1/PLA2G10/CPB1/SLC4A4
hsa04066	hsa04066	HIF-1 signaling pathway	105	0.478	2.114	0	0	0	738	tags=23%, list=4%, signal=22%	SLC2A1/ENO2/HMOX1/ENO1/IL6/ALDOC/SERPINE1/VEGFA/ EIF4E1B/EGLN3/HKDC1/GAPDH/PFKP/ANGPT2/PFKFB3/HK2/ FLT1/CDKN1A/ALDOA/PDK1/CAMK2A/PGK1/HK3/CAMK2G
hsa04080	hsa04080	Neuroactive ligand-receptor interaction	355	0.296	1.553	0	0.001	0	3421	tags=32%, list=21%, signal=26%	ADM/NMB/PRLH/KISS1R/HCRTR1/UTS2R/GRIN1/GRIK5/TBXA2R/ LTB4R2/GALR3/FPR1/CHRNA2/SSTR1/NPFFR1/GRIN3B/CHRNA9/ CRH/P2RX2/HRH1/NPB/F2/P2RX6/FPR2/HTR1A/POMC/CHRNE/GHSR/ RLN3/SCT/C5AR1/CHRNB2/GRM2/BDKRB1/HRH3/NTSR1/HCRT/PTGER1/PYY/ ADORA2B/VIPR2/SLURP1/TRH/GHRHR/CALCB/MC1R/P2RX3/S1PR5/ADRA1B/ CHRNA4/P2RY2/GHRH/HTR6/AVPR1A/ADRA2C/EDN2/MCHR1/P2RY6/UCN/ PATE1/VGF/GRIN3A/ADRA1D/TAC3/UCN2/CALCR/OXT/APLN/MTNR1…
hsa00982	hsa00982	Drug metabolism - cytochrome P450	56	-0.567	-1.997	0	0.001	0.001	1777	tags=32%, list=11%, signal=29%	FMO4/AOX1/GSTA1/HPGDS/GSTM5/GSTK1/CYP2C9/GSTM3/ UGT2B15/FMO2/UGT2A3/MAOB/CYP2C19/CYP3A5/MAOA/ FMO5/ADH1B/ADH1C
hsa04512	hsa04512	ECM-receptor interaction	86	0.452	1.941	0	0.001	0.001	2460	tags=37%, list=15%, signal=32%	TNC/FN1/ITGA5/SPP1/LAMB3/LAMA5/COL1A2/ITGB3/ ITGA3/THBS1/COL1A1/LAMA4/ITGA2B/COL6A2/LAMC2/ COL9A2/COL4A6/GP9/GP6/ITGA7/GP1BB/SDC1/COL6A1/SV2A/ COL6A3/ITGA11/VWF/LAMB1/LAMB2/ITGB7/THBS3/ITGB5
hsa04530	hsa04530	Tight junction	160	-0.432	-1.776	0	0.001	0.001	3734	tags=38%, list=23%, signal=29%	JAM2/HSPA4/RAB8A/AMOT/CTTN/RAB8B/VASP/PRKACA/ MYH14/MYH11/RAPGEF6/ROCK2/TJP3/LLGL2/MYL12A/CDC42/ CD1C/ERBB2/ACTR2/MAPK10/PRKAB1/CACNA1D/ARPC3/PRKAG1/ RAC1/MAP3K1/PRKAA1/TJAP1/SLC9A3R1/RAP2C/MYL12B/HCLS1/ F11R/PPP2CA/ACTR3C/DLG3/TJP2/ARPC5/MAP3K5/GATA4/CGNL1/ PRKCI/CLDN11/MAP2K7/CGN/PPP2R1B/PPP2CB/CLDN23/ROCK1/ MARVELD2/CLDN1/SYNPO/TJP1/EPB41L4B/CLDN10/OCLN/PRKACB/ CLDN2/CFTR/CLDN18
hsa05164	hsa05164	Influenza A	159	-0.431	-1.771	0	0.001	0.001	3212	tags=35%, list=20%, signal=28%	IFNAR2/PIK3CA/CREBBP/TBK1/KPNA6/AKT1/STAT1/MX1/ HLA-DRB1/EIF2AK2/HLA-DOA/NFKB1/TYK2/IFNGR1/ADAR/ CALCOCO2/NXT2/PRKCA/XPO1/IKBKE/HLA-DQA1/PIK3R3/ IFIH1/TLR7/CCND3/TLR4/IRAK4/TLR3/CIITA/CHUK/JAK2/ CASP3/MYD88/RAB11A/IFNA21/IRF9/HLA-DPB1/RAB11B/ CASP1/PIK3CB/AKT3/PIK3R1/CCL5/HLA-DMB/PRSS3/JAK1/DNAJC3/ IFNAR1/HLA-DMA/IL33/TMPRSS2/HLA-DPA1/FAS/HLA-DRA/PRSS1
hsa04070	hsa04070	Phosphatidylinositol signaling system	94	-0.468	-1.803	0	0.012	0.01	4153	tags=46%, list=25%, signal=34%	INPP1/PIP4K2C/PLCE1/INPP5A/INPP5F/PIKFYVE/CALM1/ INPP5B/PPIP5K1/CALM2/OCRL/PI4KB/INPP5D/PIK3CA/MTM1/ DGKH/PI4KA/PIP4K2B/ITPR2/PRKCA/PIK3R3/PLCB1/MTMR4/ MTMR1/CALM3/PPIP5K2/PLCG2/PIK3C2A/IP6K2/ITPR1/PIK3C2B/ PIK3C2G/PIK3CB/PIK3R1/PIP4K2A/SYNJ1/CDS1/IMPA2/SACM1L/ PLCB4/CALML4/PTEN/PIP5K1B
hsa04970	hsa04970	Salivary secretion	86	-0.461	-1.747	0.001	0.018	0.015	2438	tags=26%, list=15%, signal=22%	ITPR2/PRKCA/CST1/ADCY9/PLCB1/CHRM3/CALM3/ATP1A1/ CST3/ITPR1/GNAQ/VAMP2/SLC9A1/PLCB4/CALML4/ATP1B1/ SLC12A2/DMBT1/FXYD2/PRKACB/AMY2B/LYZ
hsa04976	hsa04976	Bile secretion	78	-0.471	-1.749	0.001	0.027	0.021	1122	tags=18%, list=7%, signal=17%	NR0B2/SLC9A1/BAAT/UGT2B15/UGT2A3/ABCC3/ATP1B1/ ABCB1/FXYD2/SLC5A1/PRKACB/CA2/CFTR/SLC4A4
hsa05160	hsa05160	Hepatitis C	153	-0.394	-1.611	0.001	0.033	0.026	3547	tags=32%, list=22%, signal=25%	CASP8/EIF3E/TRAF6/RSAD2/LDLR/IFIT1/IFNAR2/PIK3CA/ TBK1/AKT1/STAT1/MX1/CFLAR/YWHAZ/EIF2AK2/NFKB1/TYK2/ IKBKE/PIK3R3/YWHAB/EGFR/TLR3/CHUK/EIF2AK3/RIPK1/ YWHAH/CASP3/PPP2CA/IFNA21/NRAS/IRF9/SOS1/CTNNB1/ CLDN11/PIK3CB/AKT3/PIK3R1/PPP2R1B/PPP2CB/CLDN23/ JAK1/IFNAR1/EIF2AK1/CLDN1/FAS/CLDN10/OCLN/CLDN2/CLDN18
hsa01200	hsa01200	Carbon metabolism	109	0.352	1.575	0.001	0.033	0.026	1389	tags=19%, list=8%, signal=18%	ENO2/ENO1/ALDOC/PSAT1/HKDC1/GAPDH/PFKP/ACADS/HK2/ ALDOA/GLYCTK/PGK1/HK3/SHMT2/PGAM1/PGAM2/AGXT/GPI/ PC/PGAM4/RGN
hsa01230	hsa01230	Biosynthesis of amino acids	69	0.411	1.699	0.002	0.039	0.031	1238	tags=22%, list=8%, signal=20%	ENO2/ENO1/ALDOC/PSAT1/GAPDH/PFKP/BCAT1/ALDOA/NAGS/ PGK1/SHMT2/PGAM1/PGAM2/PC/PGAM4
hsa00010	hsa00010	Glycolysis / Gluconeogenesis	64	0.41	1.68	0.002	0.039	0.031	1238	tags=27%, list=8%, signal=25%	ENO2/ENO1/ALDOC/HKDC1/GAPDH/PFKP/ALDH1B1/HK2/ALDOA/ PGK1/HK3/PGAM1/ALDH3B1/PGAM2/LDHA/GPI/PGAM4
hsa04918	hsa04918	Thyroid hormone synthesis	75	-0.454	-1.677	0.002	0.039	0.031	2438	tags=28%, list=15%, signal=24%	ITPR2/PRKCA/ADCY9/PLCB1/GSR/CANX/ATP1A1/GPX8/ALB/ ITPR1/IYD/GNAQ/TTR/GPX3/PLCB4/CREB3L1/DUOX2/ ATP1B1/FXYD2/PRKACB/GPX2
hsa04728	hsa04728	Dopaminergic synapse	131	-0.388	-1.551	0.002	0.039	0.031	3772	tags=35%, list=23%, signal=27%	KCNJ3/PPP2R5D/ATF4/GNAO1/CALM1/PRKACA/GRIN2A/CALM2/ GRIA4/PPP2R5E/AKT1/DDC/PPP3CB/MAPK10/CACNA1D/ITPR2/ PRKCA/GNAI3/PLCB1/PPP1CB/CACNA1A/GNG11/CALM3/PPP2CA/ GNG7/KIF5B/ITPR1/PPP2R5C/GNAQ/COMT/GNG5/ARRB1/AKT3/ PPP2R1B/PPP3CA/PPP2R5A/PPP2CB/GNG12/PPP1CC/PLCB4/ CALML4/CREB3L1/MAOB/MAOA/PRKACB/PPP1R1B
hsa05205	hsa05205	Proteoglycans in cancer	199	0.292	1.442	0.002	0.039	0.031	1391	tags=20%, list=8%, signal=19%	FN1/ITGA5/PLAU/CAV1/WNT7B/VEGFA/FLNA/TWIST1/HOXD10/ NUDT16L1/FLNC/TGFB1/WNT11/MMP9/WNT9A/COL1A2/ITGB3/ CDKN1A/PLAUR/THBS1/GPC1/COL1A1/CAMK2A/FZD10/WNT3/ MAPK11/WNT10A/CAMK2G/SHH/WNT5B/TIMP3/WNT10B/RRAS/ TGFB2/HBEGF/SDC1/HPSE2/RPS6KB2/PXN/WNT16
hsa00980	hsa00980	Metabolism of xenobiotics by cytochrome P450	62	-0.482	-1.731	0.002	0.041	0.032	1371	tags=23%, list=8%, signal=21%	GSTA1/AKR7A3/HPGDS/GSTM5/GSTK1/CYP2C9/GSTM3/ UGT2B15/CYP1B1/UGT2A3/CYP3A5/CYP2S1/ADH1B/ADH1C
hsa00512	hsa00512	Mucin type O-glycan biosynthesis	30	-0.579	-1.795	0.002	0.041	0.032	1722	tags=37%, list=10%, signal=33%	C1GALT1C1/GALNT1/GALNT6/GALNT3/GCNT3/GALNT7/ GALNT12/GCNT1/GCNT4/C1GALT1/GALNT4
hsa05206	hsa05206	MicroRNAs in cancer	160	0.303	1.449	0.003	0.049	0.038	2569	tags=28%, list=16%, signal=24%	TNC/ITGA5/HMOX1/PLAU/FSCN1/HMGA2/PTGS2/DDIT4/ VEGFA/HOXD10/SERPINB5/MMP9/ITGB3/PIM1/CDKN1A/ THBS1/PDGFB/NOTCH4/TP63/WNT3/DNMT3B/SOX4/ TIMP3/TGFB2/BMF/IGF2BP1/E2F2/APC2/BRCA1/CDCA5/ MAP2K1/CYP24A1/CDC25C/RDX/NOTCH1/CCNE1/SHC1/EFNA1/ CDKN2A/MET/MMP16/BCL2L11/VIM/DNMT3A/HRAS
